# Supplementary material for: Experimental and theoretical study on the regioselective bis- or polyalkylation of 6-amino-2-mercapto-3H-pyrimidin-4-one using zeolite nano-gold catalyst and a quantum hybrid computational method
Source: Royal Society of Chemistry journal article supplement (doi:10.1039/d2ra06572j), 2022-01-01
Supplement: d2ra06572j1.pdf [file d2ra06572j1.pdf]

|      |                                                                                     |                                                                                      |
|------|-------------------------------------------------------------------------------------|--------------------------------------------------------------------------------------|
| HOMO | 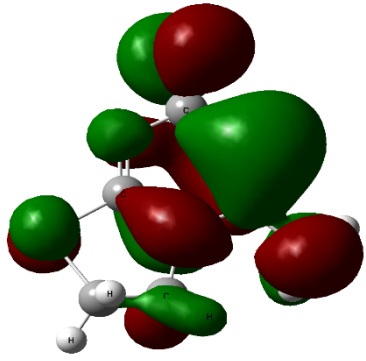   |    |
|      | <b>11a</b>                                                                          | <b>12a</b>                                                                           |
| LUMO |    |    |
|      | <b>11a</b>                                                                          | <b>12a</b>                                                                           |
| HOMO |  |  |
|      | <b>11b</b>                                                                          | <b>12b</b>                                                                           |
| LUMO |  |  |
|      | <b>11b</b>                                                                          | <b>12b</b>                                                                           |

Fig. S1. HOMO, and LUMO maps, of different Regio isomer **11a** & **12a** and **11b** & **12b** compounds at the B3LYP/6-311++G(d,p).

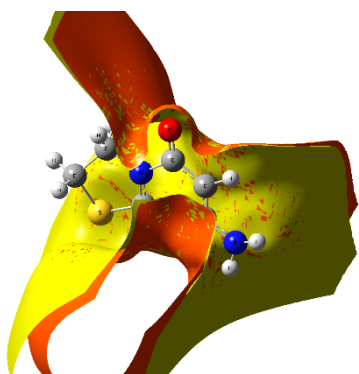

12a

ESP

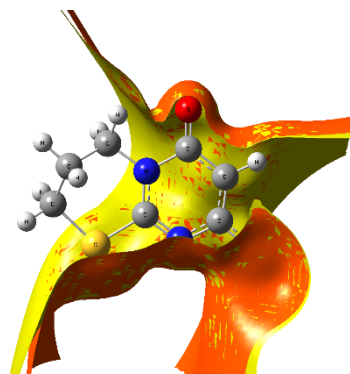

12b

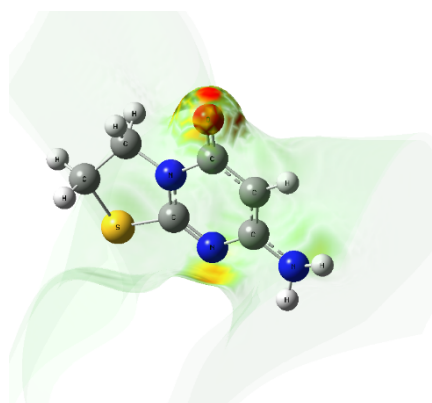

12a

3D-MEP

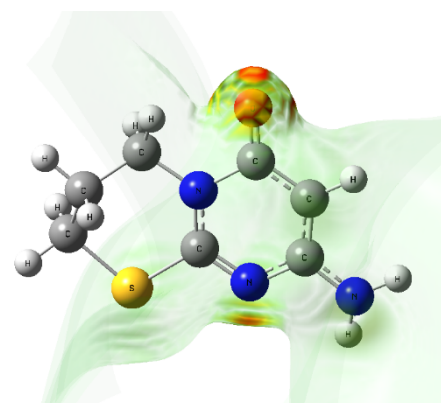

12b

Fig.S2. ESP, and MEP maps, for the studied compounds **12a** and **12b** at the B3LYP/6-311++G(d,p).

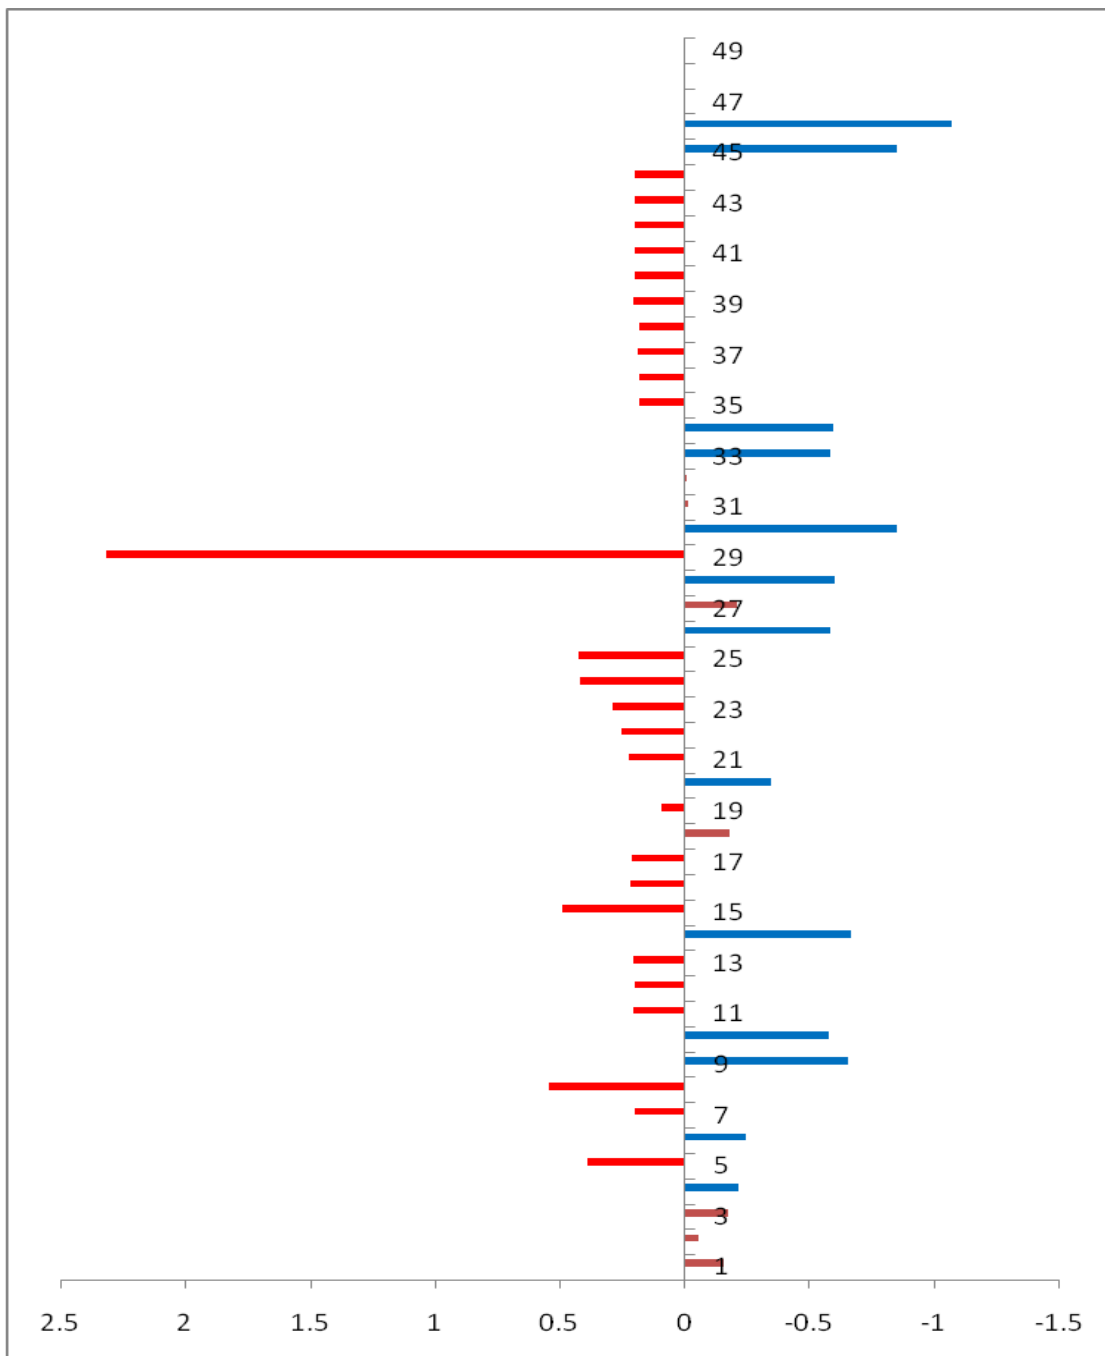

Atomic charge distribution

■ Negative Charge value

■ Positive Charge value

Fig.S3. Atomic charge distribution (e) for the studied compounds **12a** using B3LYP/6-311++G (d,p).

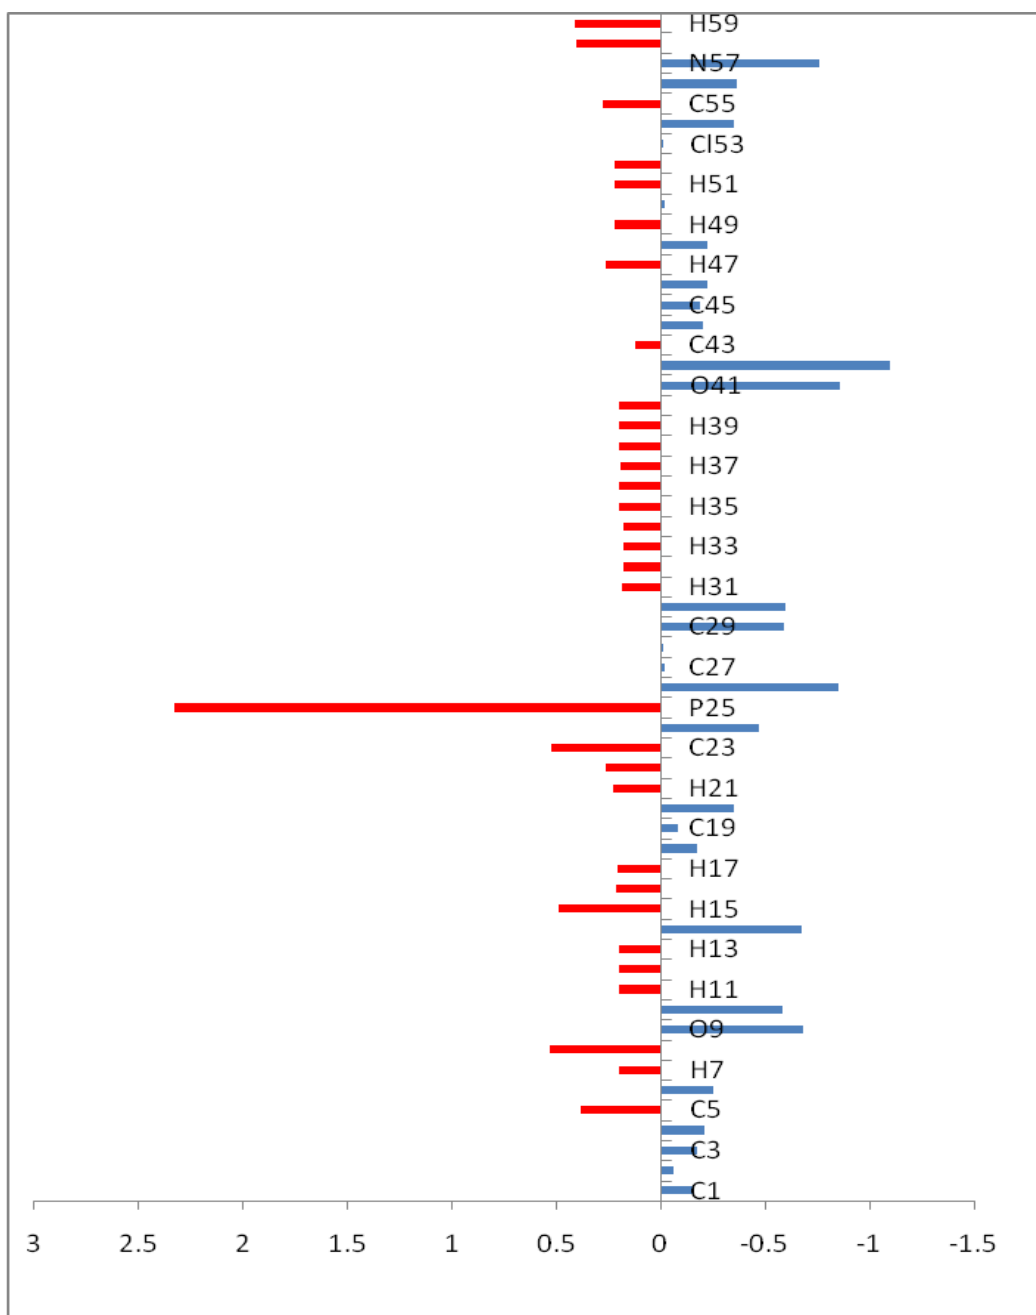

Atomic charge distribution

■ Negative Charge value

■ Positive Charge value

Fig.S4. Atomic charge distribution (e) for the studied compounds **12b** using B3LYP/6-311++G (d,p).



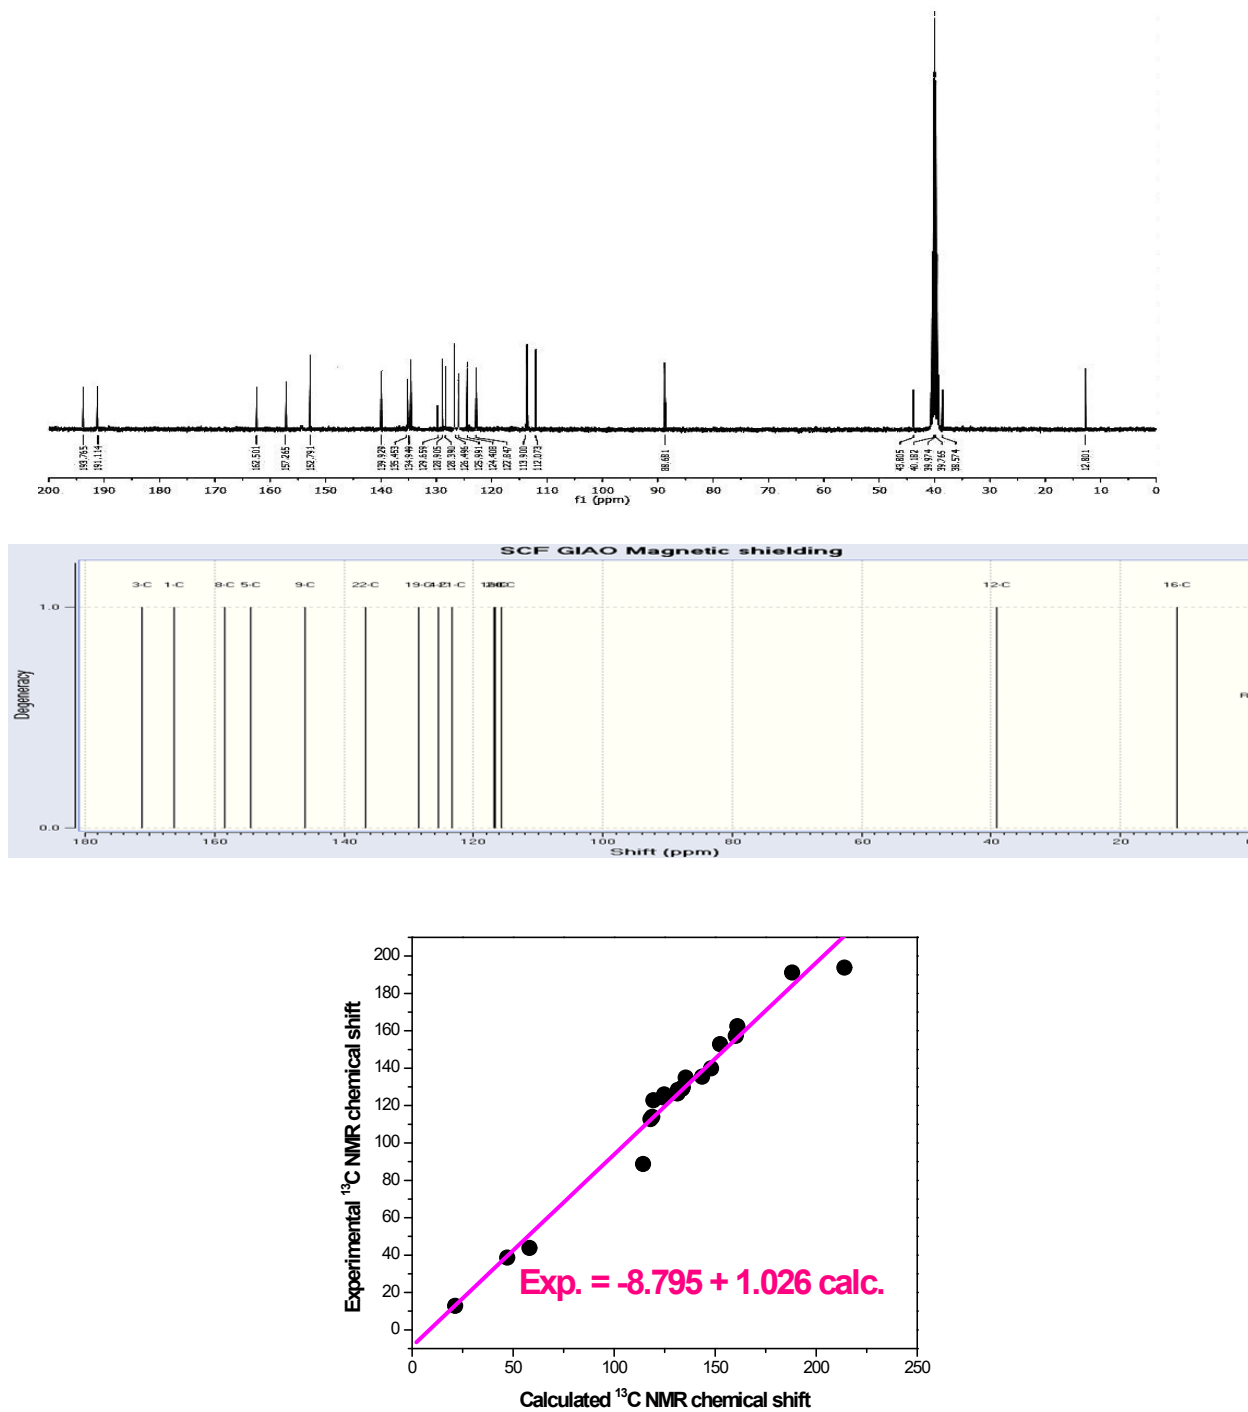

Fig. S6. (a) Experimental and (b) Calculated  $^{13}\text{C}$  NMR spectrum, (c) Correlation graph between experimental and calculated  $^{13}\text{C}$  NMR chemical shifts of **12a** at B3LYP/6-311++G (d,p).

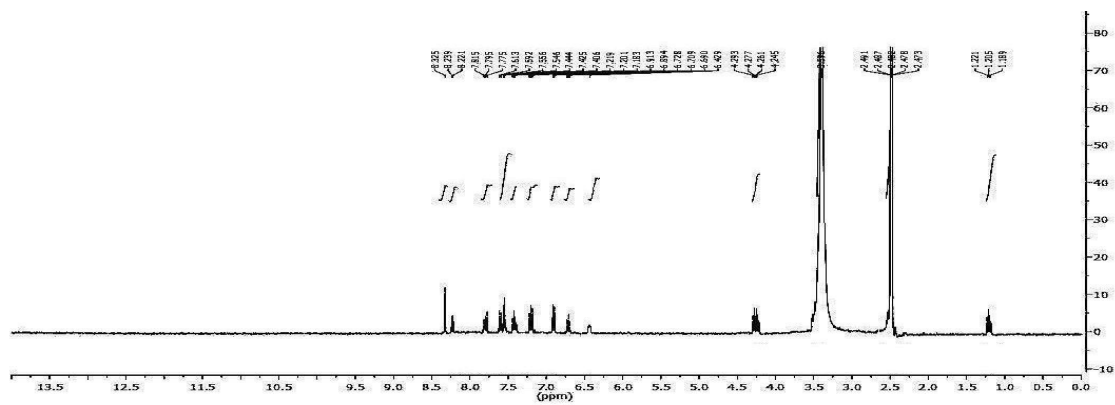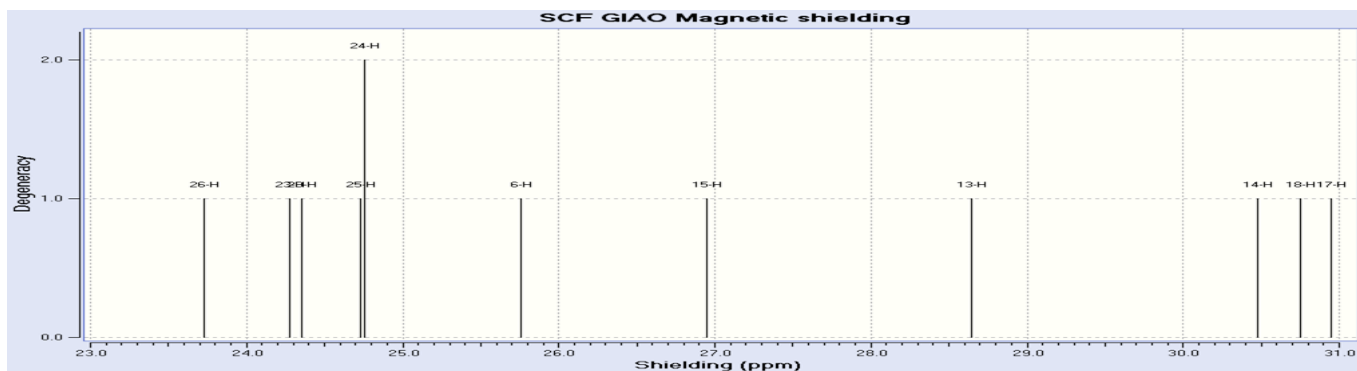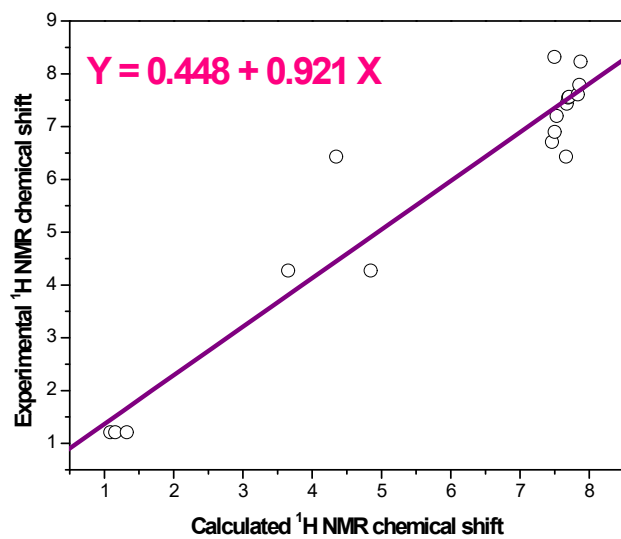

Fig. S7. (a) Experimental and (b) Calculated  $^1\text{H}$  NMR spectrum, (c) Correlation graph between experimental and calculated  $^1\text{H}$ -NMR chemical shifts of **12b** at B3LYP/6-311++G (d,p).



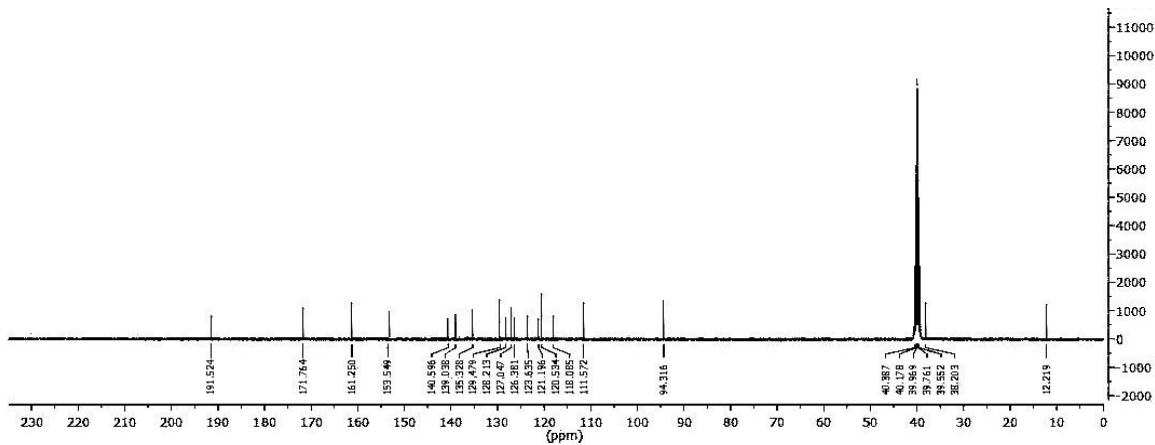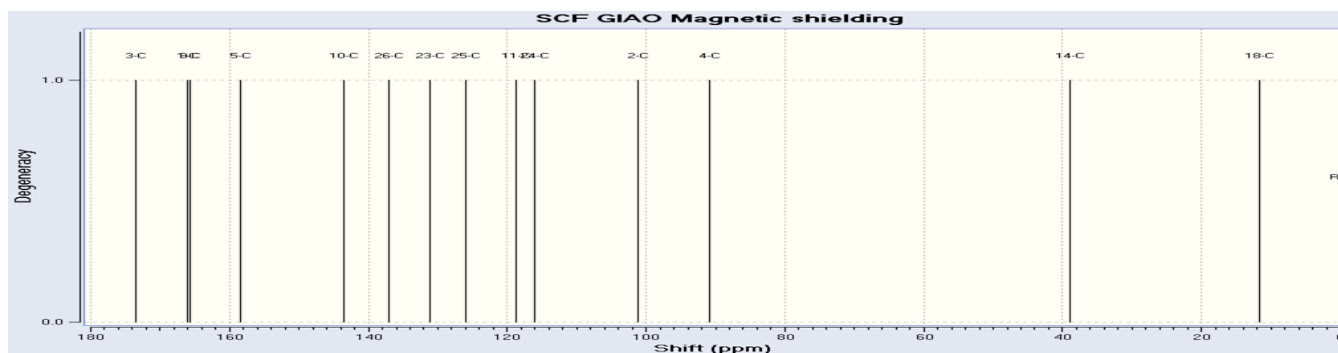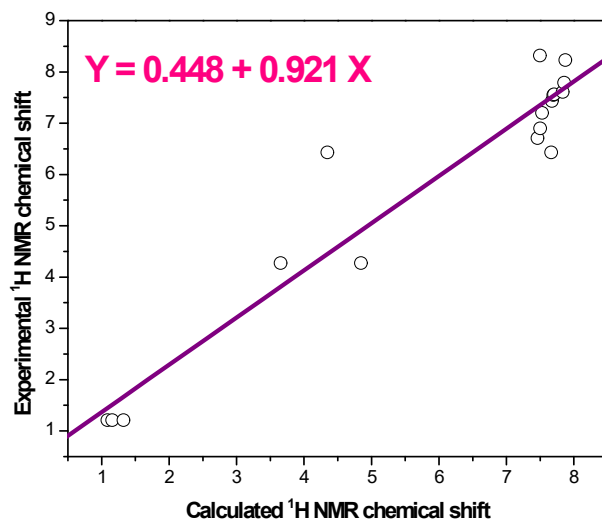

Fig. S8. (a) Experimental and (b) Calculated  $^{13}\text{C}$  NMR spectrum, (c) Correlation graph between experimental and calculated  $^{13}\text{C}$  NMR chemical shifts of **12b** at B3LYP/6-311++G (d,p).

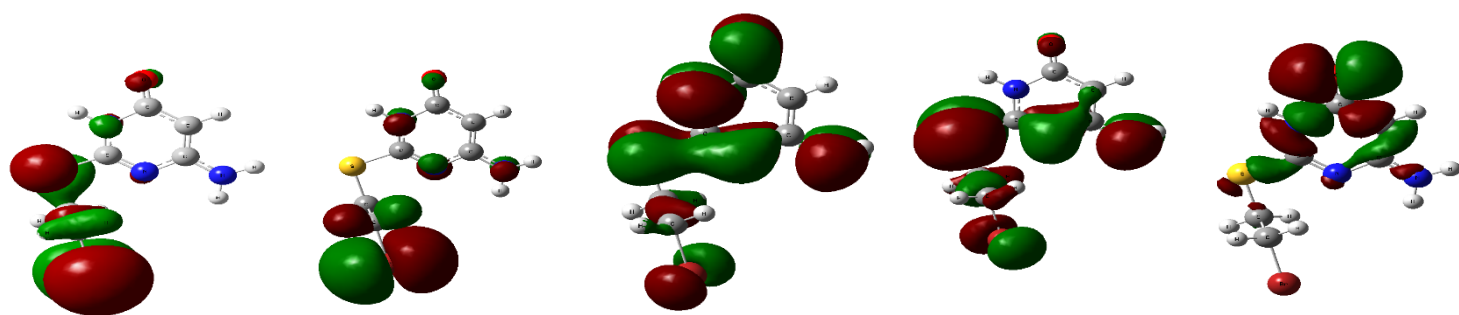

Φ57

Φ58

Φ59

Φ60

Φ61

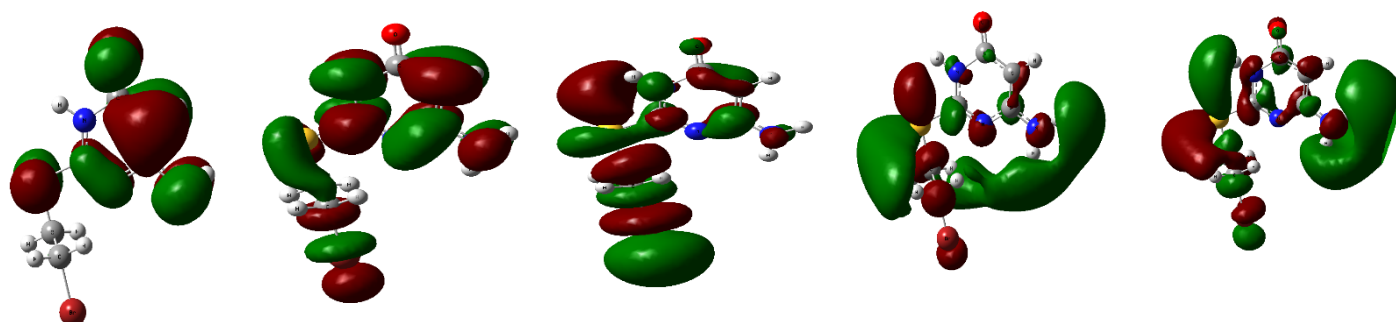

Φ62

Φ63

Φ64

Φ65

Φ66

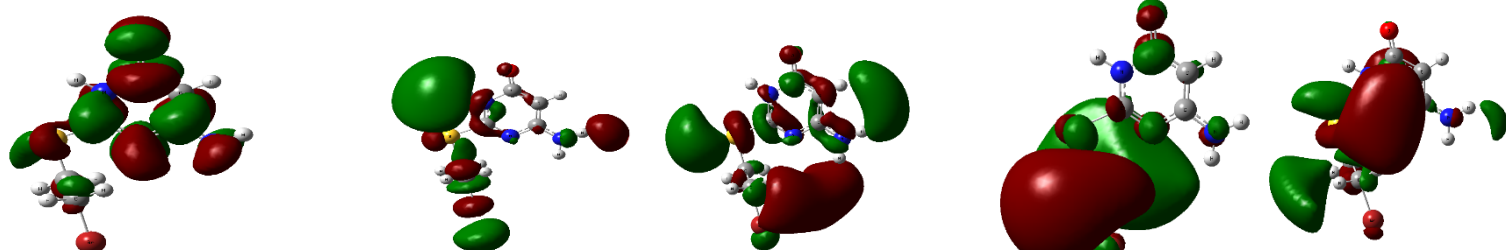

Φ67

Φ68

Φ69

Φ70

Φ71

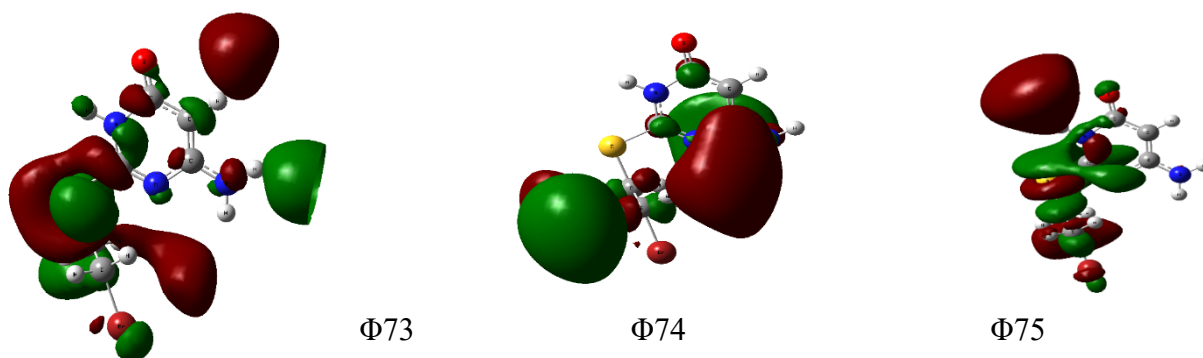

Φ73

Φ74

Φ75

Fig. S9. Electron density contours of compound 12a.

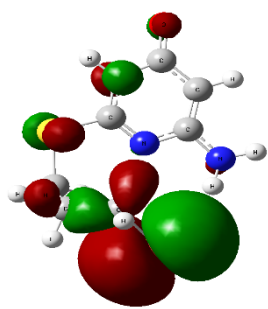

$\Phi 61$

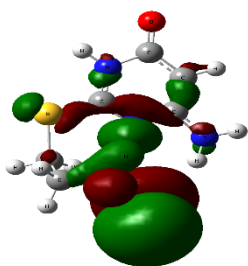

$\Phi 62$

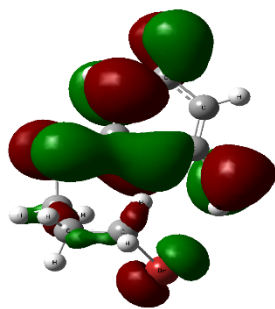

$\Phi 63$

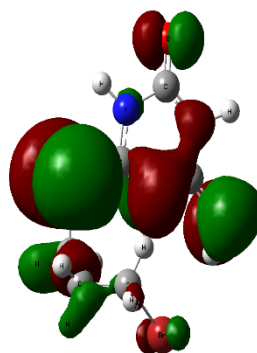

$\Phi 64$

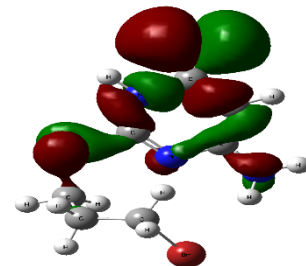

$\Phi 65$

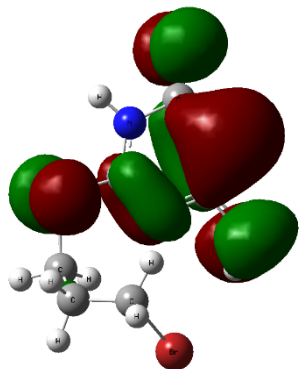

$\Phi 66$

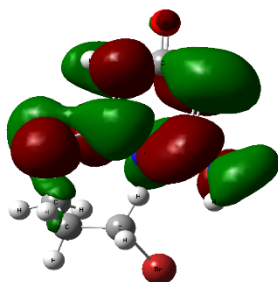

$\Phi 67$

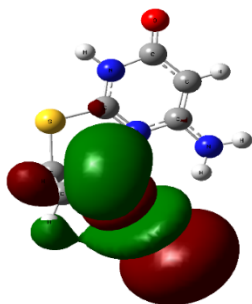

$\Phi 68$

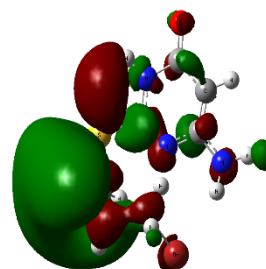

$\Phi 69$

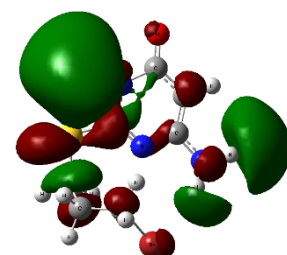

$\Phi 70$

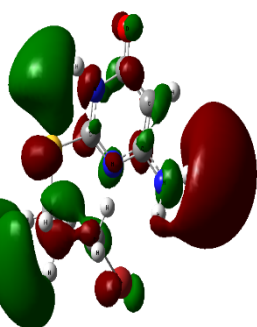

$\Phi 71$

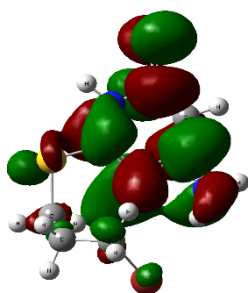

$\Phi 72$

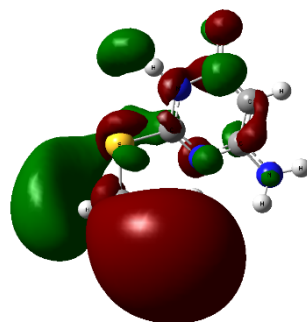

$\Phi 73$

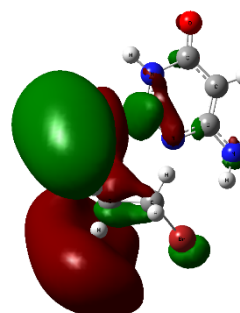

$\Phi 74$

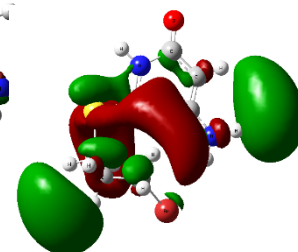

$\Phi 75$

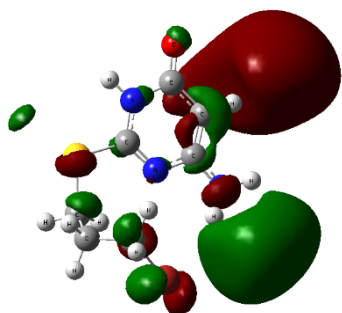

$\Phi 76$

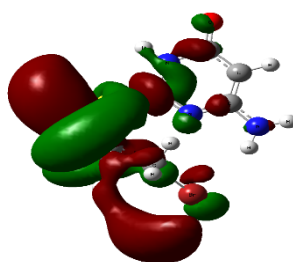

$\Phi 77$

Fig. S10. Electron density contours of compound **12b**.

Table S1. Equilibrium bond lengths, (Å), bond angles, (°), Dihedral angles, (°), and Net charges, (°), for studied compounds **12a** and **12b** at the B3LYP/6-311++G(d,p).

| Parameters               | <b>12a</b> | <b>12b</b> | Exp. [92-94] |
|--------------------------|------------|------------|--------------|
| Bond lengths (Å)         |            |            |              |
| C1-N8                    | 1.297      | 1.295      | 1.290        |
| C2- N9                   | 1.361      | 1.364      | 1.341        |
| C1-S10                   | 1.782      | 1.780      | 1.874        |
| C4-O6                    | 1.220      | 1.221      | 1.285        |
| S10-C13                  | 1.838      | 1.844      | 1.874        |
| C13-C14                  | 1.515      | 1.531      | 1.521        |
| C14-C15                  | -----      | 1.520      | 1.440        |
| Bond angles (°)          |            |            |              |
| <C2N9H12                 | 119.05     | 116.85     | 117.61       |
| <H12N9H11                | 119.45     | 117.74     | 118.44       |
| <C2N9H11                 | 121.47     | 119.55     | 117.61       |
| <O6C4C3                  | 128.98     | 128.90     | 125.21       |
| <C1N8C2                  | 116.98     | 117.34     | 115.52       |
| <C1S10C13                | 101.16     | 102.86     | 105.35       |
| <N7C4O6                  | 118.56     | 118.53     | 117.56       |
| <S10C13C14               | 111.54     | 114.68     | 110.21       |
| Dihedral angles (°)      |            |            |              |
| <N8C1S10C13              | 0.33       | 0.29       |              |
| <C1S10C13C14             | 0.60       | 0.68       |              |
| <C13C14C15H22            | 179.89     | 179.99     |              |
| Mullikan net charges (°) |            |            |              |
| O6                       | -0.364     | -0.365     |              |
| N7                       | -0.157     | -0.159     |              |
| N8                       | -0.091     | -0.024     |              |
| N9                       | -0.332     | -0.255     |              |
| S10                      | -0.005     | -0.038     |              |

Table S2. Second Order Perturbation Interaction Energy Values Computed in the NBO Basis for the studied compounds **12a** and **12b**, calculated at B3LYP/6-311++G (d, p).

| Compound   | Donor          | Acceptor         | E <sup>(2)a</sup> (kcal/mol) | NBO              | Population |
|------------|----------------|------------------|------------------------------|------------------|------------|
| <b>12a</b> | $\pi$ C1- N8   | $\pi^*$ C2-C3    | 21.33                        | $\pi$ C1- N8     | 1.86322    |
|            | $\pi$ C2-C3    | $\pi^*$ C4-O6    | 31.26                        | $\pi$ C2-C3      | 1.76401    |
|            | LP (1) O6      | RY*C4            | 16.84                        | LP (1) O6        | 1.97809    |
|            | LP (2) O6      | $\sigma^*$ C3-C4 | 15.85                        | LP (2) O6        | 1.85119    |
|            | LP (2) O6      | $\sigma^*$ C4-N7 | 31.56                        | LP (1) N7        | 1.61679    |
|            | LP (1) N7      | $\pi^*$ C1-N8    | 67.41                        | LP (1) N8        | 1.89158    |
|            | LP (1) N7      | $\pi^*$ C4-O6    | 40.65                        | LP (1) N9        | 1.76497    |
|            | LP (1) N8      | $\sigma^*$ C1-N7 | 13.02                        | LP (2) S10       | 1.81885    |
|            | LP (1) N9      | $\pi^*$ C2-C3    | 48.68                        | $\pi^*$ C1- N8   | 0.43454    |
|            | LP (2) S10     | $\pi^*$ C1-N8    | 26.02                        | $\sigma^*$ C4-N7 | 0.10466    |
|            | $\pi^*$ C1- N8 | $\pi^*$ C2-C3    | 57.47                        | $\pi^*$ C4-O6    | 0.37004    |
|            |                |                  |                              | $\sigma^*$ C3-C4 | 0.04818    |
|            |                |                  |                              | $\pi^*$ C2-C3    | 0.34154    |
|            |                |                  |                              | $\pi^*$ C1-N8    | 0.39644    |
|            |                |                  | $\sigma^*$ C1-N7             | 0.04719          |            |
|            |                |                  | RY*C4                        | 0.01582          |            |
| <b>12b</b> | $\pi$ C1- N8   | $\pi^*$ C2-C3    | 21.35                        | $\pi$ C1- N8     | 1.86164    |
|            | $\pi$ C2-C3    | $\pi^*$ C4-O6    | 31.30                        | $\pi$ C2-C3      | 1.76336    |
|            | LP (1) O6      | RY*C4            | 16.83                        | LP (1) O6        | 1.97812    |
|            | LP (2) O6      | $\pi^*$ C3-C4    | 15.81                        | LP (2) O6        | 1.85210    |
|            | LP (2) O6      | $\pi^*$ C4-N7    | 31.37                        | LP (1) N7        | 1.61798    |
|            | LP (1) N7      | $\pi^*$ C1-N8    | 66.54                        | LP (1) N8        | 1.88903    |
|            | LP (1) N7      | $\sigma^*$ C4-O6 | 40.88                        | LP (1) N9        | 1.77240    |
|            | LP (1) N8      | $\pi^*$ C1-N7    | 13.31                        | LP (2) S10       | 1.82710    |
|            | LP (1) N9      | $\pi^*$ C2-C3    | 43.73                        | $\pi^*$ C1- N8   | 0.39664    |
|            | LP (2) S10     | $\sigma^*$ C1-N8 | 25.56                        | $\sigma^*$ C4-N7 | 0.10404    |
|            | $\pi^*$ C1- N8 | $\pi^*$ C2-C3    | 58.61                        | $\pi^*$ C4-O6    | 0.37093    |
|            |                |                  |                              | $\sigma^*$ C3-C4 | 0.04813    |
|            |                |                  |                              | $\pi^*$ C2-C3    | 0.33880    |
|            |                |                  |                              | $\pi^*$ C1-N8    | 0.39644    |
|            |                |                  | $\sigma^*$ C1-N7             | 0.04793          |            |
|            |                |                  | RY*C4                        | 0.01580          |            |

<sup>a</sup>E<sup>(2)</sup> means energy of hyperconjugative interactions (stabilization energy).

LP<sub>(n)</sub> is a valence lone pair orbital (n) on atom.

Table S3. Natural Charge, Natural Population and Natural electronic Configuration of active sites in studied compounds **12a** and **12b** using B3LYP/6-311++G (d,p) .

| Compound   | Atom No. | Natural Charge | Natural Population |         |         |       | Natural electronic Configuration   |
|------------|----------|----------------|--------------------|---------|---------|-------|------------------------------------|
|            |          |                | Core               | Valence | Rydberg | total |                                    |
| <b>12a</b> | O6       | -0.62901       | 1.999              | 6.616   | 0.0137  | 8.629 | [core]2S (1.70)2p (4.92)3p(0.01)3d |
|            | N7       | -0.61427       | 1.999              | 5.598   | 0.0171  | 7.614 | [core]2S (1.27)2p (4.32)4p(0.01)   |
|            | N8       | -0.61138       | 1.999              | 5.585   | 0.0272  | 7.611 | [core]2S (1.36)2p (4.22)3p(0.01)3d |
|            | N9       | -0.76672       | 1.999              | 5.753   | 0.0146  | 7.767 | [core]2S (1.29)2p (4.46)3p (0.01)  |
|            | S10      | 0.26751        | 9.999              | 5.697   | 0.0367  | 15.73 | [core]3S (1.67)3p(4.02)3d( 0.02)5S |
| 12b        | O6       | -0.63173       | 1.999              | 6.618   | 0.0137  | 8.632 | [core]2S(1.70)2p( 4.92)3p( 0.01)3d |
|            | N7       | -0.61512       | 1.999              | 5.599   | 0.0171  | 7.615 | [core]2S(1.27)2p( 4.32)4p( 0.01)   |
|            | N8       | -0.61097       | 1.999              | 5.585   | 0.0272  | 7.611 | [core]2S(1.36)2p( 4.23)3p( 0.01)3d |
|            | N9       | -0.76830       | 1.999              | 5.753   | 0.0159  | 7.768 | [core]2S(1.31)2p( 4.44)3p( 0.01)   |
|            | S10      | 0.24573        | 9.999              | 5.718   | 0.0367  | 15.75 | [core]3S(1.67)3p( 4.05)3d( 0.02)5S |

For numbering system, see Fig. 5

Table S4. Natural population of the total electrons in studied compounds **12a** and **12b** using B3LYP/6-311++G (d,p) .

| Parameters        | <b>12a</b>                 | <b>12b</b>                 |
|-------------------|----------------------------|----------------------------|
| Core              | 57.99081 (99.984% of 58)   | 59.99007 (99.983% of 60)   |
| Valence Lewis     | 64.13715 (97.178% of 66)   | 70.08560 (97.341% of 72)   |
| Total Lewis       | 122.12796 (98.490% of 124) | 130.07566 (98.542% of 132) |
| Valence non-Lewis | 1.66999 (1.347% of 124)    | 1.70843 (1.294% of 132)    |
| Rydberg non-Lewis | 0.20205 (0.163% of 124)    | 0.21591 (0.164% of 132)    |
| Total non-Lewis   | 1.87204 (1.510% of 124)    | 1.92434 (1.458% of 132)    |

Table S5: Total static dipole moment ( $\mu$ ), the mean polarizability ( $\langle\alpha\rangle$ ), the anisotropy of the polarizability ( $\Delta\alpha$ ), and the mean first-order hyperpolarizability ( $\langle\beta\rangle$ ), for studied compounds **12a** and **12b** by B3LYP/6-311++G (d,p).

| Property               | PNA                                     | <b>12a</b>                  | <b>12b</b>                  |
|------------------------|-----------------------------------------|-----------------------------|-----------------------------|
| $\mu_x$                |                                         | 2.8426 Debye                | -4.6592 Debye               |
| $\mu_y$                |                                         | 1.3018 Debye                | 1.1481 Debye                |
| $\mu_z$                |                                         | -0.8187 Debye               | 0.1138 Debye                |
| $\mu$                  | 2.44 Debye <sup>a</sup>                 | 3.2319 Debye                | 4.7999 Debye                |
| $\alpha_{XX}$          |                                         | -124.2609 a.u.              | -127.4420 a.u.              |
| $\alpha_{XY}$          |                                         | -9.6431 a.u.                | -3.4665 a.u.                |
| $\alpha_{YY}$          |                                         | -75.6116 a.u.               | -82.7208 a.u.               |
| $\alpha_{ZZ}$          |                                         | -92.5943 a.u.               | -98.1690 a.u.               |
| $\alpha_{YZ}$          |                                         | -1.1935 a.u.                | 0.0986 a.u.                 |
| $\alpha_{XZ}$          |                                         | 3.0791 a.u.                 | -4.0274 a.u.                |
| $\langle\alpha\rangle$ | $22 \times 10^{-24}$ esu <sup>b</sup>   | $35.25 \times 10^{-24}$ esu | $45.21 \times 10^{-24}$ esu |
| $\Delta\alpha$         |                                         | $46.31 \times 10^{-24}$ esu | $56.02 \times 10^{-24}$ esu |
| $\beta_{xxx}$          |                                         | 247.2045 a.u.               | -237.0187 a.u.              |
| $\beta_{xxy}$          |                                         | 31.7250 a.u.                | 22.0527 a.u.                |
| $\beta_{xyy}$          |                                         | 5.0827 a.u.                 | -16.7915 a.u.               |
| $\beta_{yyy}$          |                                         | 54.4033 a.u.                | -65.4942 a.u.               |
| $\beta_{xxz}$          |                                         | -23.0361 a.u.               | -16.5512 a.u.               |
| $\beta_{xyz}$          |                                         | -1.5676 a.u.                | -0.4051 a.u.                |
| $\beta_{yyz}$          |                                         | -3.6459 a.u.                | -2.5183 a.u.                |
| $\beta_{xzz}$          |                                         | 41.5856 a.u.                | -38.3195 a.u.               |
| $\beta_{yzz}$          |                                         | 1.5336 a.u.                 | -2.6481 a.u.                |
| $\beta_{zzz}$          |                                         | 5.7093 a.u.                 | 4.8290 a.u.                 |
| $\langle\beta\rangle$  | $15.5 \times 10^{-30}$ esu <sup>c</sup> | $25.16 \times 10^{-30}$ esu | $36.28 \times 10^{-30}$ esu |
| DR                     |                                         | 0.35                        | 0.46                        |
| $\beta_{HRS}$          |                                         | 45.25                       | 56.12                       |

<sup>a, b, c</sup> PNA results are taken from references [97–99].



Table S6: Calculated thermodynamically parameters for studied compounds **12a** and **12b** at the B3LYP/6-311++G(d,p).

| Parameters                                                  | <b>12a</b> | <b>12b</b> |
|-------------------------------------------------------------|------------|------------|
| Zero Point Vibrational Energy (kcal.mol <sup>-1</sup> )     | 91.12637   | 109.44726  |
| Rotational constant (GHz)                                   |            |            |
| A                                                           | 1.23056    | 0.83593    |
| B                                                           | 0.24365    | 0.30103    |
| C                                                           | 0.20828    | 0.23050    |
|                                                             |            |            |
| Entropy Total (S) (cal mol <sup>-1</sup> K <sup>-1</sup> )  | 114.061    | 120.565    |
| Translational                                               | 42.437     | 42.600     |
| Rotational                                                  | 32.909     | 32.983     |
| Vibrational                                                 | 38.715     | 44.982     |
|                                                             |            |            |
| Thermal Energy Total (E) (kcal mol <sup>-1</sup> )          | 98.712     | 117.975    |
| Translational                                               | 0.889      | 0.889      |
| Rotational                                                  | 0.889      | 0.889      |
| Vibrational                                                 | 96.934     | 116.197    |
|                                                             |            |            |
| Specific heat (CV) (cal mol <sup>-1</sup> K <sup>-1</sup> ) | 43.408     | 49.627     |
| Translational                                               | 2.981      | 2.981      |
| Rotational                                                  | 2.981      | 2.981      |
| Vibrational                                                 | 37.446     | 43.665     |

Table S7: Thermodynamic properties at different temperatures of **12a** and **12b** at the B3LYP/6-311++G(d,p).

| T (K) | $H^0_m$ (kcalmol <sup>-1</sup> ) |            | $C^0_{p,m}$ (calmol <sup>-1</sup> K <sup>-1</sup> ) |            | $S^0_m$ (calmol <sup>-1</sup> K <sup>-1</sup> ) |            |
|-------|----------------------------------|------------|-----------------------------------------------------|------------|-------------------------------------------------|------------|
|       | <b>12a</b>                       | <b>12b</b> | <b>12a</b>                                          | <b>12b</b> | <b>12a</b>                                      | <b>12b</b> |
| 200   | 116.14                           | 118.41     | 50.80                                               | 52.08      | 120.10                                          | 123.01     |
| 250   | 118.93                           | 121.39     | 60.74                                               | 62.47      | 132.96                                          | 134.69     |
| 300   | 122.20                           | 125.02     | 69.93                                               | 71.39      | 145.23                                          | 147.32     |
| 350   | 125.91                           | 127.19     | 78.31                                               | 80.13      | 156.95                                          | 158.59     |
| 400   | 130.01                           | 133.10     | 85.87                                               | 87.78      | 168.18                                          | 170.08     |
| 450   | 134.48                           | 137.84     | 92.64                                               | 94.46      | 178.92                                          | 180.29     |
| 500   | 139.27                           | 141.72     | 98.66                                               | 100.11     | 189.21                                          | 191.12     |
| 550   | 144.33                           | 146.44     | 104.00                                              | 107.01     | 199.06                                          | 200.60     |
| 600   | 149.66                           | 151.22     | 108.75                                              | 111.57     | 208.49                                          | 211.94     |

Table S8: Experimental and Computed excitation energies (in eV), electronic transition configurations, and oscillator strengths  $f$  for the optical transitions of the absorption bands in the UV-vis. regions (involving HOMOs) of the compound **12a** at the CAM-B3LYP/6-311++G (d,p).

| Compound | Medium    | Transition | Excitation energies | Type of transition | $\lambda_{max}/nm$<br>Th and Ex. | Oscillator strengths ( $f$ ) | Configuration composition corresponding transition orbital                                                                                               |
|----------|-----------|------------|---------------------|--------------------|----------------------------------|------------------------------|----------------------------------------------------------------------------------------------------------------------------------------------------------|
|          | Gas phase | 3          | 4.85                | n- $\pi^*$         | 256                              | 0.1691                       | 0.65(62 ->63); -0.17(62 ->64); -0.14(62 ->65)                                                                                                            |
|          |           | 22         | 6.17                | n- $\pi^*$         | 203                              | 0.1665                       | 0.17(57 ->63); 0.12(57 ->65); 0.47(60 ->63); -0.17(60 ->64); -0.21(61 ->63); -0.11(61 ->70); -0.12(62 ->65); -0.19(62 ->67); 0.10(62 ->70)               |
|          |           | 29         | 6.45                | $\pi$ - $\pi^*$    | 192                              | 0.3208                       | 0.51(59 ->63); -0.15(59 ->64); 0.10(62 ->65); -0.20(62 ->67); 0.22(62 ->68); 0.18(62 ->70)                                                               |
|          |           | 35         | 6.75                | $\pi$ - $\pi^*$    | 184                              | 0.0728                       | 0.14(59 ->63); 0.12(60 ->63); -0.11(62 ->65); 0.26(62 ->67); -0.26(62 ->68); 0.11(62 ->69); 0.37(62 ->70); -0.11(62 ->71); 0.27(62 ->73); -0.12(62 ->75) |
|          |           |            |                     |                    |                                  |                              |                                                                                                                                                          |
|          |           |            | 4                   | 4.94               | n- $\pi^*$                       | 251<br>211                   | 0.2534                                                                                                                                                   |
|          |           | 15         | 5.93                | n- $\pi^*$         | 209                              | 0.2427                       | -0.20 (56 ->63); 0.10 (59 ->63); 0.57 (61 -                                                                                                              |



Table S9: Experimental and Computed excitation energies (in eV), electronic transition configurations, and oscillator strengths  $f$  for the optical transitions of the absorption bands in the UV-vis. regions (involving HOMOs) of the compound **12b** at the CAM-B3LYP/6-311++G (d,p).

| Compound | Medium    | Transition | Excitation energies | Type of transition | $\lambda_{max/nr}$<br><i>Th and</i><br>Ex. | Oscillator strengths ( $f$ ) | Configuration composition corresponding transition orbital                                                                                                                                     |
|----------|-----------|------------|---------------------|--------------------|--------------------------------------------|------------------------------|------------------------------------------------------------------------------------------------------------------------------------------------------------------------------------------------|
|          | Gas phase | 3          | 4.84                | n- $\pi^*$         | 256                                        | 0.1645                       | 0.65(66 ->67); -0.20(66 ->68)                                                                                                                                                                  |
|          |           | 22         | 6.09                | n- $\pi^*$         | 204                                        | 0.1301                       | -0.11(64 ->75); 0.45(65 ->67); -0.18(65 ->68);<br>-0.11(65 ->70); -0.14(65 ->75); -0.15(66 ->68);<br>-0.15(66 ->71); -0.11(66 ->72); -0.17(66 ->74)                                            |
|          |           | 30         | 6.48                | $\pi$ - $\pi^*$    | 191                                        | 0.2592                       | 0.43(63 ->67); -0.13(63 ->68); -0.13(63 ->70);<br>-0.11(66 ->68); 0.14(66 ->71); 0.16(66 ->73);<br>-0.18(66 ->74); -0.26(66 ->75); -0.14(66 ->76)                                              |
|          |           | 34         | 6.65                | $\pi$ - $\pi^*$    | 187                                        | 0.0375                       | -0.11(63 ->67); 0.13(65 ->68); 0.10(65 ->70);<br>0.11(65 ->73); 0.11(66->68); 0.10(66 ->71);<br>-0.30(66 ->72); 0.17(66 ->73); -0.21(66 ->74);<br>0.12(66 ->75); 0.34(66 ->76); -0.13(66 ->77) |

|  |                      |    |      |                 |            |        |                                                                                                                                                                                                      |
|--|----------------------|----|------|-----------------|------------|--------|------------------------------------------------------------------------------------------------------------------------------------------------------------------------------------------------------|
|  |                      |    |      |                 |            |        |                                                                                                                                                                                                      |
|  | Methanol             | 3  | 4.93 | n- $\pi^*$      | 252<br>212 | 0.2546 | 0.68 (66->67)                                                                                                                                                                                        |
|  |                      | 15 | 5.90 | n- $\pi^*$      | 210<br>209 | 0.1291 | 0.36 (60 ->67); 0.11 (62 ->67); 0.22 (63 ->67);<br>-0.39(65 ->70); 0.13(65 ->72); -0.11(65 ->72)                                                                                                     |
|  |                      | 24 | 6.41 | $\pi$ - $\pi^*$ | 193<br>172 | 0.3157 | 0.17 (61 ->67); 0.57 (64 ->67); 0.11 (65 ->73);<br>-0.15 (66 ->71); 0.19 (66 ->73)                                                                                                                   |
|  |                      | 38 | 6.92 | $\pi$ - $\pi^*$ | 179<br>145 | 0.0721 | 0.11(64 ->71); 0.25(64 ->73); 0.17(65 ->69);<br>-0.18(65 ->71); 0.19(65 ->72); -0.21(65 ->73);<br>0.12(65 ->74); 0.10(66 ->70); 0.14(66 ->71);<br>0.27(66 ->76); -0.11(66 ->77); -0.13(66 ->78)      |
|  | Dioxane              | 3  | 4.84 | n- $\pi^*$      | 256<br>220 | 0.2466 | 0.68 (66->67)                                                                                                                                                                                        |
|  |                      | 16 | 5.91 | n- $\pi^*$      | 210<br>215 | 0.1498 | 0.37(60 ->63); -0.18(62 ->64); 0.11(64 ->63);<br>0.42(65 ->64); -0.13(65 ->65); -0.11(66 ->67)                                                                                                       |
|  |                      | 25 | 6.34 | $\pi$ - $\pi^*$ | 196<br>182 | 0.2618 | -0.12(61 ->67); 0.52(63 ->67); -0.13(66 ->68);<br>-0.19(66 ->69); 0.25(66 ->71); 0.13(66 ->74)                                                                                                       |
|  |                      | 40 | 6.96 | $\pi$ - $\pi^*$ | 178<br>151 | 0.1169 | 0.13(63 ->73); 0.30(63 ->74); -0.18(63 ->75);<br>-0.13(64 ->68); -0.21(64 ->70); -0.23(64 ->71);<br>-0.17(65 ->68); -0.14(65 ->72); -0.14(65 ->73);<br>-0.17(65 ->74); -0.10(66 ->68); 0.10(66 ->70) |
|  |                      |    |      |                 |            |        |                                                                                                                                                                                                      |
|  | DMSO                 | 4  | 4.92 | n- $\pi^*$      | 252<br>212 | 0.2658 | 0.68 (66->67)                                                                                                                                                                                        |
|  |                      | 15 | 5.90 | n- $\pi^*$      | 210<br>209 | 0.1524 | 0.34 (60 ->67); 0.10 (62 ->67); -0.20 (63 ->67);<br>0.41(65 ->70); -0.13(65 ->72); -0.11(65 ->72)                                                                                                    |
|  |                      | 24 | 6.40 | $\pi$ - $\pi^*$ | 194<br>173 | 0.3269 | 0.17 (61 ->67); 0.57 (64 ->67); 0.11 (65 ->73);<br>-0.15 (66 ->71); 0.19 (66 ->73)                                                                                                                   |
|  |                      | 38 | 6.92 | $\pi$ - $\pi^*$ | 179<br>145 | 0.0698 | 0.12(64 ->71); 0.25(64 ->73); 0.14(65 ->69);<br>0.10(65 ->71); -0.17(65 ->72); 0.20(65 ->73);<br>-0.19(65 ->74); 0.11(66 ->70); 0.14(66 ->71);<br>0.28(66 ->74); -0.11(66 ->76); -0.14(66 ->77)      |
|  | 1,2-dichloro-methane | 3  | 4.90 | n- $\pi^*$      | 253<br>217 | 0.2596 | 0.68 (66->67)                                                                                                                                                                                        |
|  |                      | 15 | 5.90 | n- $\pi^*$      | 210<br>215 | 0.1348 | 0.36(60 ->67); 0.24(63 ->67); 0.40(65 ->67);<br>-0.13(65 ->70); 0.14(66 ->72)                                                                                                                        |
|  |                      | 24 | 6.39 | $\pi$ - $\pi^*$ | 194<br>180 | 0.3241 | 0.16(61 ->67); 0.57(64 ->67); 0.11(65 ->73);<br>-0.11(66 ->69); 0.15(66 ->71); 0.19(66 ->74)                                                                                                         |
|  |                      | 38 | 6.91 | $\pi$ - $\pi^*$ | 179<br>152 | 0.0988 | -0.10(64 ->68); 0.29(64 ->73); -0.13(64 ->74);<br>0.13(65 ->68); 0.25(65 ->69); -0.17(65 ->71);<br>0.12(65 ->72); -0.25(65 ->73); 0.15(65 ->74);<br>0.10(66 ->69); 0.11(66 ->71); 0.11(66 ->72)      |

Table S10: The Optimized structures of studied compound **11a** at B3LYP/6-311++G (d,p).

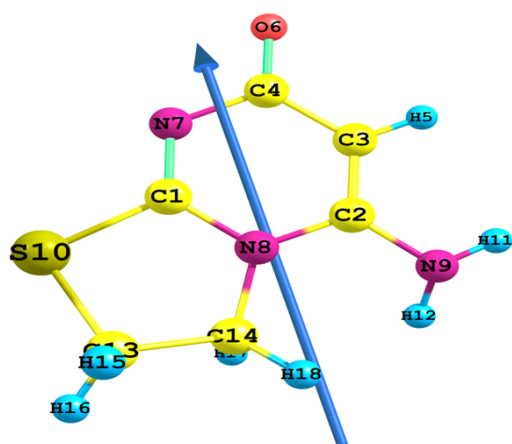

**11a**

|   |              |              |              |
|---|--------------|--------------|--------------|
| C | 0.293651000  | -0.759893000 | 0.017650000  |
| C | -1.012844000 | 1.220861000  | -0.056294000 |
| C | -2.116055000 | 0.429097000  | -0.004455000 |





|   |              |              |              |
|---|--------------|--------------|--------------|
| C | -2.218635000 | 1.077083000  | 0.076658000  |
| H | -3.389273000 | -0.768851000 | 0.094171000  |
| O | -3.148341000 | 1.866099000  | 0.042281000  |
| N | -0.884738000 | 1.526744000  | 0.170397000  |
| N | -0.014950000 | -0.677202000 | -0.006256000 |
| N | -1.422375000 | -2.583171000 | -0.102883000 |
| S | 1.678802000  | 1.512641000  | 0.294595000  |
| H | -2.385128000 | -2.890476000 | -0.078172000 |
| H | -0.858958000 | -3.123215000 | 0.542052000  |
| C | 2.902726000  | 0.154935000  | 0.133875000  |
| C | 2.366692000  | -0.947236000 | -0.763643000 |
| C | 1.128241000  | -1.600743000 | -0.169557000 |
| H | 3.794267000  | 0.619945000  | -0.289661000 |
| H | 3.157550000  | -0.233583000 | 1.122815000  |
| H | 2.144425000  | -0.553381000 | -1.759527000 |
| H | 3.124153000  | -1.728978000 | -0.882615000 |
| H | 1.381042000  | -2.041383000 | 0.804003000  |
| H | 0.792092000  | -2.403449000 | -0.825075000 |

Table S12: The Optimized structures of studied compound **12a** at B3LYP/6-311++G (d,p).

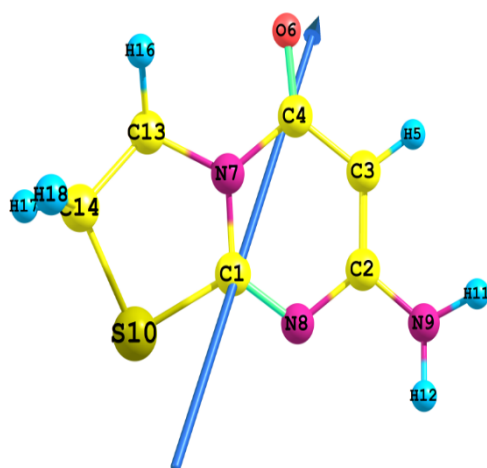

**12a**

|   |              |              |              |
|---|--------------|--------------|--------------|
| C | -0.279668000 | -0.698775000 | 0.050724000  |
| C | 1.983658000  | -0.668033000 | -0.009055000 |
| C | 2.021382000  | 0.712067000  | -0.020995000 |
| C | 0.816217000  | 1.478089000  | -0.020864000 |



|   |              |              |              |
|---|--------------|--------------|--------------|
| C | -0.770661000 | 2.270897000  | -0.317946000 |
| C | -1.444447000 | 1.032735000  | -0.491360000 |
| H | -1.331653000 | 3.172997000  | -0.520246000 |
| O | -2.599183000 | 0.859127000  | -0.859046000 |
| N | -0.628988000 | -0.135553000 | -0.188131000 |
| N | 1.263307000  | 1.164045000  | 0.345905000  |
| N | 1.240784000  | 3.457628000  | 0.295795000  |
| S | 1.733088000  | -1.351462000 | 0.588109000  |
| H | 0.886132000  | 4.318550000  | -0.085703000 |
| H | 2.239798000  | 3.373315000  | 0.396988000  |
| C | -1.284559000 | -1.441094000 | -0.385243000 |
| C | -0.806572000 | -2.498782000 | 0.596777000  |
| C | 0.662605000  | -2.833131000 | 0.386160000  |
| H | -1.114180000 | -1.769868000 | -1.416872000 |
| H | -2.351263000 | -1.250307000 | -0.285313000 |
| H | -0.980401000 | -2.165034000 | 1.624081000  |
| H | -1.404358000 | -3.402760000 | 0.442593000  |
| H | 0.826948000  | -3.253088000 | -0.608209000 |
| H | 1.026204000  | -3.548314000 | 1.125704000  |
